# Supplementary material
Source: PubMed Central journal article supplement (PMC2978562)
Supplement: supp_M110.145607_jbc.M110.145607-1.pdf [file supp_M110.145607_jbc.M110.145607-1.pdf]

Supplementary Material for

**Calcium-mediated stress kinase activation is necessary for osteoblast differentiation**

Asha Eapen<sup>1</sup>, Premanand Sundivakkam<sup>2</sup>, Yiqiang Song,<sup>1</sup> Sriram Ravindran<sup>1</sup>, Amsaveni Ramachandran<sup>1</sup>, Chinnaswamy Tirupathi<sup>2</sup> and Anne George<sup>1\*</sup>

<sup>1</sup> Brodie Tooth Development Genetics and Regenerative Medicine Research Laboratory, University of Illinois at Chicago, <sup>2</sup>Department of Pharmacology, University of Illinois at Chicago, Chicago, IL, 60612, USA

**Running Title:** Stress activated p38 signaling and osteoblast differentiation

\* To whom correspondence should be addressed.

**Tel:** 312-413-0738; **Fax:** 312-996-6044; **E-mail:** [anneg@uic.edu](mailto:anneg@uic.edu)

**Keywords:** Dentin matrix protein 1, p38 MAP kinase, MAPKAPK2, HSP 27, osteoblast differentiation

This PDF file includes:

**Fig. S1**

Treatment of MC3T3-E1 cells with DMSO for 4 and 24 hours had no effect on the gene expression profile

**Fig. S2**

The levels of phospho-p38 remained the same in the DMSO treated samples and control

(A). Phosphorylation of MAPKAPK2 was similar in cells treated with DMSO and untreated cells (B) Activation of p38 MAPK pathway is dependent on DMP1 signaling during terminal differentiation of osteoblast (C).



**Fig. S1**

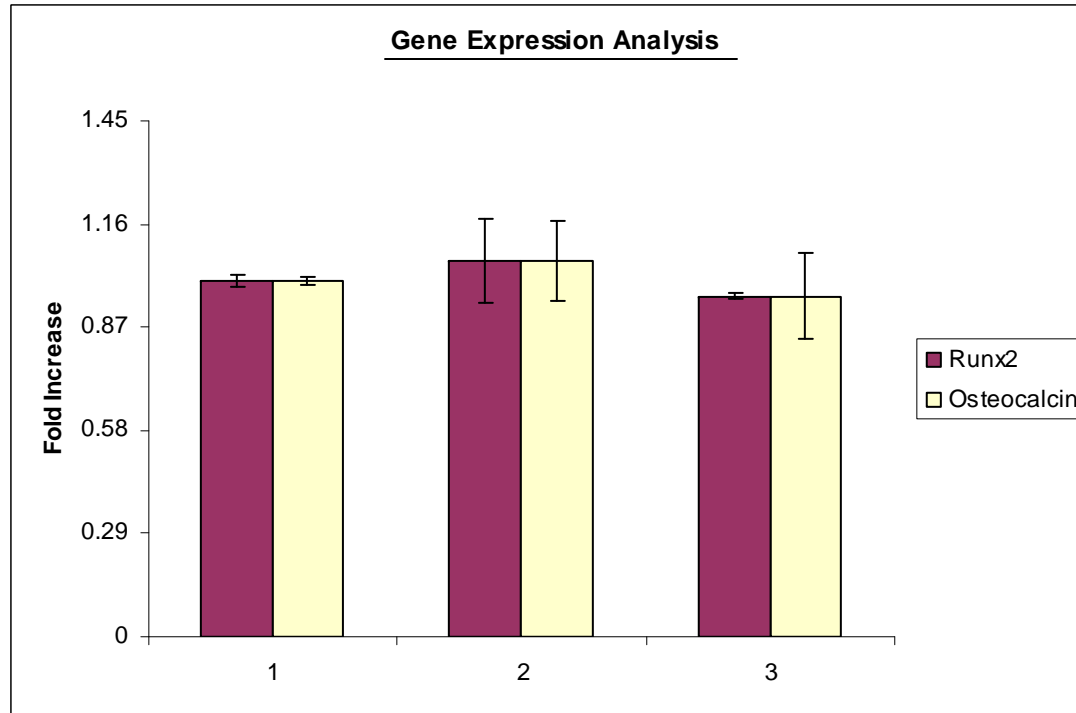

**Fig. S2**

**A**

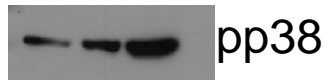

|      |   |   |   |
|------|---|---|---|
| DMSO | - | + | + |
| DMP1 | - | - | + |

**B**

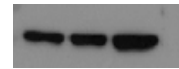

pMAPKAPK2

|      |   |   |   |
|------|---|---|---|
| DMSO | - | + | + |
| DMP1 | - | - | + |

**C**

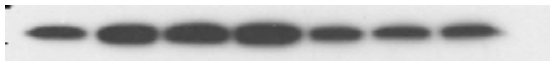

|  |       |    |     |     |    |     |     |
|--|-------|----|-----|-----|----|-----|-----|
|  | C     | 7d | 14d | 21d | 7d | 14d | 21d |
|  | (21d) |    |     |     |    |     |     |

|          |   |   |   |   |   |   |   |
|----------|---|---|---|---|---|---|---|
| DMP1     | - | + | + | + | + | + | + |
| SB203580 | - | - | - | - | + | + | + |
